# Supplementary material for: A peptide encoded by the circular form of the SHPRH gene induces apoptosis in neuroblastoma cells
Source: PeerJ. 2024 Jan 23;12:e16806. doi: 10.7717/peerj.16806 (PMC10812589; doi:10.7717/peerj.16806)
Supplement: Supplemental Information 2 [file peerj-12-16806-s002.xlsx]

## Sheet: Sheet1
Figure 1D-E
		SH-SY5Y			SK-N-AS
	Day1	Over-NC	Over-circSHPRH		Over-NC	Over-circSHPRH
		0.3324	0.1359		0.3324	0.1859
		0.3511	0.1223		0.3611	0.1823
		0.3262	0.2318		0.3262	0.2318
		0.3824	0.2425		0.3724	0.2625
		0.3234	0.2355		0.3234	0.2355
		0.3131	0.2682		0.3611	0.2782
		0.4649	0.2736		0.3699	0.2836
		0.4037	0.2757		0.4237	0.2747
	Day2	0.7971	0.5587		0.6671	0.3482
		0.8013	0.5676		0.6213	0.3076
		0.6007	0.5512		0.6707	0.3016
		0.5184	0.5147		0.6184	0.3147
		0.8047	0.5212		0.6047	0.3212
		0.6873	0.5329		0.6253	0.3229
		0.7315	0.5371		0.6315	0.3351
		0.8987	0.4788		0.6287	0.3488
	Day3	1.1105	0.6595		1.1125	0.6542
		1.1339	0.7279		1.1439	0.5233
		1.1623	0.7685		1.1823	0.5721
		1.1513	0.5637		1.1713	0.5878
		1.2219	0.6642		1.2219	0.5687
		1.2776	0.5734		1.2776	0.5856
		1.1195	0.6072		1.2995	0.5589
		0.9645	0.5095		0.9685	0.5645
	Day4	1.9827	1.0023		1.9827	1.0063
		1.9415	1.0213		1.9416	1.0763
		1.9775	0.9986		1.9778	1.9956
		1.9879	0.9994		1.9829	1.9934
		1.9849	1.5987		1.9879	1.9967
		1.8889	1.6991		1.9849	0.9791
		1.9529	1.5312		2.0529	1.9372
		1.9421	1.5246		2.10123	1.9286
	Day5	2.7827	2.5023		2.7927	1.9099
		2.9415	2.5213		2.9315	1.9255
		2.9775	2.5986		2.9875	1.8956
		2.7879	2.0994		2.7879	1.8994
		2.8984	2.1987		2.7384	2.2987
		2.8889	2.31991		2.8889	2.3934
		2.9529	2.0312		2.5629	2.5325
		2.69421	1.9246		2.45421	2.5212
