# Supplementary material for: A peptide encoded by the circular form of the SHPRH gene induces apoptosis in neuroblastoma cells
Source: PeerJ. 2024 Jan 23;12:e16806. doi: 10.7717/peerj.16806 (PMC10812589; doi:10.7717/peerj.16806)
Supplement: Supplemental Information 3 [file peerj-12-16806-s003.xlsx]

## Sheet: Sheet1
	Figure 1B
		GAPDH				Circ-SHPRH			△Ct	△△Ct	2-△△Ct
		HCN-2	18.01				22.12
			17.98				22.31
			18.01	18			22.53	22.32	4.32	0	1
		IMR-32	18.56				24.31
			18.63				23.46
			18.64	18.61			23.52	23.7633	5.15333	0.833333	0.561231
		SK-N-SH	18.21				23.91
			18.25				23.72
			18.26	18.24			23.93	23.8533	5.61333	1.29333	0.408007
		SH-SY5Y	18.15				23.95
			18.23				23.96
			18.13	18.17			23.98	23.9633	5.79333	1.47333	0.360149
		SK-N-AS	18.02				24.99
			18.01				24.96
			18.03	18.02			24.88	24.9433	6.92333	1.77	0.293209
	Figure 1C
		GAPDH				Circ-SHPRH			△Ct	△△Ct	2-△△Ct
	SH-SY5Y	Over-NC	18.01				22.12
			17.98				22.31
			18.01	18			22.53	22.32	4.32	0	1
		Over-circSHPRH	18.88				22.55
			19.23				22.26
			19.24	19.1167			22.56	22.4567	3.34	-0.98	1.97247
	SK-N-AS	Over-NC	18.01				22.12
			17.98				22.31
			18.01	18			22.53	22.32	4.32	0	1
		Over-circSHPRH	19.51				22.21
			19.23				22.32
			18.86	19.2			22.22	22.25	3.05	-1.27	2.41162
