# Supplementary material for: A peptide encoded by the circular form of the SHPRH gene induces apoptosis in neuroblastoma cells
Source: PeerJ. 2024 Jan 23;12:e16806. doi: 10.7717/peerj.16806 (PMC10812589; doi:10.7717/peerj.16806)
Supplement: Supplemental Information 8 [file peerj-12-16806-s008.xlsx]

## Sheet: Sheet1
Figure 2D-2E
		BCL2
		GAPDH				Circ-SHPRH			△Ct	△△Ct	2-△△Ct
	SH-SY5Y	Over-NC	18.01				22.12
			17.98				22.31
			18.01	18			22.53	22.32	4.32	0	1
		Over-CircSHPRH	18.16				24.01
			18.23				23.96
			18.24	18.21			23.92	23.9633	5.75333	1.43333	0.370274
	SK-N-AS	Over-NC	18.01				22.12
			17.98				22.31
			18.01	18			22.53	22.32	4.32	0	1
		Over-CircSHPRH	18.51				23.95
			18.23				23.75
			18.43	18.39			24.22	23.9733	5.58333	1.26333	0.41658
		cas3
		GAPDH				Circ-SHPRH			△Ct	△△Ct	2-△△Ct
	SH-SY5Y	NC	18.01				22.12
			17.98				22.31
			18.01	18			22.53	22.32	4.32	0	1
		Over-CircSHPRH	18.88				22.55
			19.23				22.26
			19.24	19.1167			22.56	22.4567	3.34	-0.98	1.97247
	SK-N-AS	NC	18.01				22.12
			17.98				22.31
			18.01	18			22.53	22.32	4.32	0	1
		Over-CircSHPRH	19.51				22.21
			19.23				22.32
			18.86	19.2			22.22	22.25	3.05	-1.27	2.41162
