# Supplementary material for: A peptide encoded by the circular form of the SHPRH gene induces apoptosis in neuroblastoma cells
Source: PeerJ. 2024 Jan 23;12:e16806. doi: 10.7717/peerj.16806 (PMC10812589; doi:10.7717/peerj.16806)
Supplement: Supplemental Information 9 [file peerj-12-16806-s009.xlsx]

## Sheet: Sheet1
Figure 3B-C
			SH-SY5Y			SK-N-AS
		Day1	Over-NC	Over-SHPRH-146aa		Over-NC	Over-SHPRH-146aa
			0.3724	0.1359		0.3524	0.25859
			0.3511	0.1423		0.3611	0.26823
			0.3662	0.2618		0.3262	0.2618
			0.3824	0.2425		0.3724	0.2625
			0.3234	0.2655		0.3434	0.2655
			0.3131	0.2682		0.3611	0.2782
			0.3649	0.2836		0.3699	0.2836
			0.3937	0.2757		0.4237	0.2747
		Day2	0.7971	0.5587		0.6671	0.5482
			0.8013	0.5676		0.6213	0.5076
			0.6007	0.5512		0.6707	0.5016
			0.5184	0.5147		0.6184	0.3147
			0.8047	0.5212		0.6047	0.3212
			0.6873	0.5329		0.6253	0.3229
			0.7315	0.5371		0.6315	0.3351
			0.8987	0.4788		0.6287	0.3488
		Day3	1.1105	0.6595		1.1125	0.6542
			1.1339	0.7279		1.1439	0.5233
			1.1623	0.7685		1.1823	0.5721
			1.1513	0.5637		1.1713	0.5878
			1.2219	0.6642		1.2219	0.5687
			1.2776	0.5734		1.2776	0.5856
			1.1195	0.6072		1.2995	0.5589
			0.9645	0.5095		0.9685	0.5645
		Day4	1.9827	1.0023		1.9827	1.0063
			1.9415	1.0213		1.9416	1.0763
			1.9775	0.9986		1.9778	1.9956
			1.9879	0.9994		1.9829	1.9934
			1.9849	1.5987		1.9879	1.9967
			1.8889	1.6991		1.9849	0.9791
			1.9529	1.5312		2.0529	1.9372
			1.9421	1.5246		2.10123	1.9286
		Day5	2.7827	2.5023		2.7927	1.9099
			2.9415	2.5213		2.9315	1.9255
			2.9775	2.5986		2.9875	1.8956
			2.7879	2.0994		2.7879	1.8994
			2.8984	2.1987		2.7384	2.2987
			2.8889	2.31991		2.8889	2.3934
			2.9529	2.0312		2.5629	2.5325
			2.69421	1.9246		2.45421	2.5212
