# Supplementary material for: A peptide encoded by the circular form of the SHPRH gene induces apoptosis in neuroblastoma cells
Source: PeerJ. 2024 Jan 23;12:e16806. doi: 10.7717/peerj.16806 (PMC10812589; doi:10.7717/peerj.16806)
Supplement: Supplemental Information 10 [file peerj-12-16806-s010.xlsx]

## Sheet: Sheet1
Figure 3A
		GAPDH				SHPRH-146aa			△Ct	△△Ct	2-△△Ct
	SH-SY5Y	Over-NC	18.01				22.12
			17.98				22.31
			18.01	18			22.53	22.32	4.32	0	1
		Over-SHPRH-146aa	18.88				22.46
			19.53				22.36
			19.24	19.2167			22.56	22.46	3.24333	-1.07667	2.10916
	SK-N-AS	Over-NC	18.01				22.12
			17.98				22.31
			18.01	18			22.53	22.32	4.32	0	1
		Over-SHPRH-146aa	19.51				22.24
			19.23				22.35
			18.86	19.2			22.26	22.2833	3.08333	-1.23667	2.35653
