# Supplementary material for: A peptide encoded by the circular form of the SHPRH gene induces apoptosis in neuroblastoma cells
Source: PeerJ. 2024 Jan 23;12:e16806. doi: 10.7717/peerj.16806 (PMC10812589; doi:10.7717/peerj.16806)
Supplement: Supplemental Information 16 [file peerj-12-16806-s016.xlsx]

## Sheet: Sheet1
		GAPDH				NFKBIA			△Ct	△△Ct	2-△△Ct
	SH-SY5Y	Over-NC	18.01				22.12
			17.98				22.31
			18.01	18			22.56	22.33	4.33	0	1
		Over-SHPRH-146aa	18.88				22.58
			19.24				22.28
			19.24	19.12			22.56	22.4733	3.35333	-0.976667	1.96791
	SK-N-AS	Over-NC	18.01				22.12
			17.98				22.31
			18.01	18			22.56	22.33	4.33	0	1
		Over-SHPRH-146aa	19.51				22.22
			19.26				22.67
			18.76	19.1767			22.74	22.5433	3.36667	-0.963333	1.94981
