# Supplementary material for: A peptide encoded by the circular form of the SHPRH gene induces apoptosis in neuroblastoma cells
Source: PeerJ. 2024 Jan 23;12:e16806. doi: 10.7717/peerj.16806 (PMC10812589; doi:10.7717/peerj.16806)
Supplement: Supplemental Information 20 [file peerj-12-16806-s020.xlsx]

## Sheet: Sheet1
SH-SY5Y		Bcl-2
	GAPDH				SHPRH-146aa			△Ct	△△Ct	2-△△Ct
	Vector	18.01				22.12
		17.98				22.31
		18.01	18			22.53	22.32	4.32	0	1
	Over-SHPRH-146aa	18.75				22.01
		18.87				22.13
		18.89	18.8367			22.02	22.0533	3.21667	-1.10333	2.14851
	Vector+NC	18.46				23.61
		18.45				23.32
		19.26	18.7233			23.13	23.3533	4.63	0.31	0.806642
	Over-SHPRH-146aa+si-NFKBIA	18.51				23.21
		18.23				23.32
		18.43	18.39			23.22	23.25	4.86	0.54	0.687771
Caspase-3	GAPDH				SHPRH-146aa			△Ct	△△Ct	2-△△Ct
	Vector	18.01				22.12
		17.98				22.31
		18.01	18			22.53	22.32	4.32	0	1
	Over-SHPRH-146aa	18.75				23.41
		18.87				24.53
		18.89	18.8367			24.62	24.1867	5.35	1.03	0.48971
	Vector+NC	18.46				23.21
		18.45				23.12
		19.26	18.7233			23.13	23.1533	4.43	0.11	0.926588
	Over-SHPRH-146aa+si-NFKBIA	18.51				23.21
		18.23				23.32
		19.43	18.7233			23.22	23.25	4.52667	0.206667	0.866537
		Bcl-2
SK-N-AS	GAPDH				SHPRH-146aa			△Ct	△△Ct	2-△△Ct
	Vector	18.01				22.12
		17.98				22.31
		18.01	18			22.53	22.32	4.32	0	1
	Over-SHPRH-146aa	18.85				22.05
		18.67				22.13
		18.89	18.8033			22.02	22.0667	3.26333	-1.05667	2.08012
	Vector+NC	18.46				23.51
		18.45				23.12
		19.26	18.7233			23.13	23.2533	4.53	0.21	0.864537
	Over-SHPRH-146aa+si-NFKBIA	18.51				23.11
		18.63				23.22
		18.43	18.5233			23.52	23.2833	4.76	0.44	0.737135
Caspase-3	GAPDH				SHPRH-146aa			△Ct	△△Ct	2-△△Ct
	Vector	18.01				22.12
		17.98				22.31
		18.01	18			22.53	22.32	4.32	0	1
	Over-SHPRH-146aa	18.75				23.61
		18.87				24.63
		18.89	18.8367			24.62	24.2867	5.45	1.13	0.456916
	Vector+NC	18.86				23.21
		18.65				23.12
		18.76	18.7567			23.13	23.1533	4.39667	0.0766667	0.948246
	Over-SHPRH-146aa+si-NFKBIA	18.51				23.21
		18.23				23.52
		19.53	18.7567			23.21	23.3133	4.55667	0.236667	0.848704
